# Supplementary material for: Spatially explicit global gross domestic product (GDP) data set consistent with the Shared Socioeconomic Pathways
Source: Copernicus journal article supplement (doi:10.5194/essd-2021-10), 2021-01-26
Supplement: Supplementary file 1 [file essd-2021-10-supplement.pdf]

## 1    **Supporting Online Materials**

2

## 3    **Spatially explicit global gross domestic product (GDP) data** 4    **set consistent with the Shared Socioeconomic Pathways**

5

6    Tingting Wang, Fubao Sun\*

7

8

## 9    **Supporting figures**

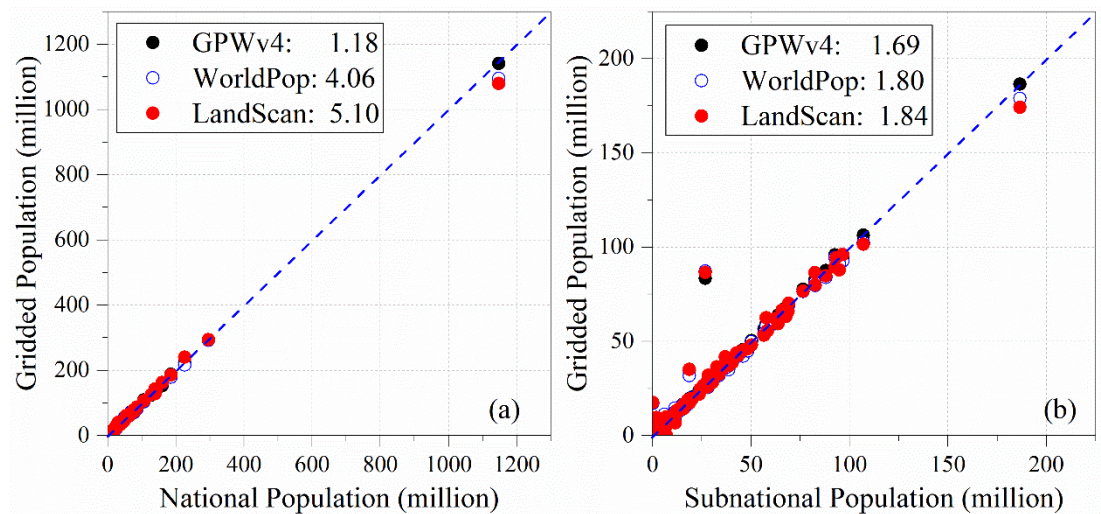

10

11    Figure S1 Comparison between national (a) and subnational (b) population between  
12    official data against gridded data sets in 2005, values in the legend are their  
13    corresponding RMSE.

14

15

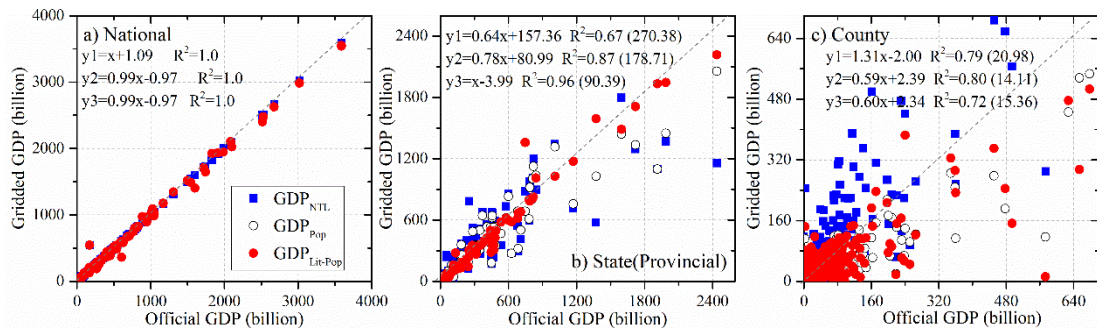

Figure S2 Comparison between official GDP and disaggregated GDP at national level (a), at state and provincial (b), and at county (c) levels in U.S. and China in 2015, values in brackets are their corresponding RMSE.

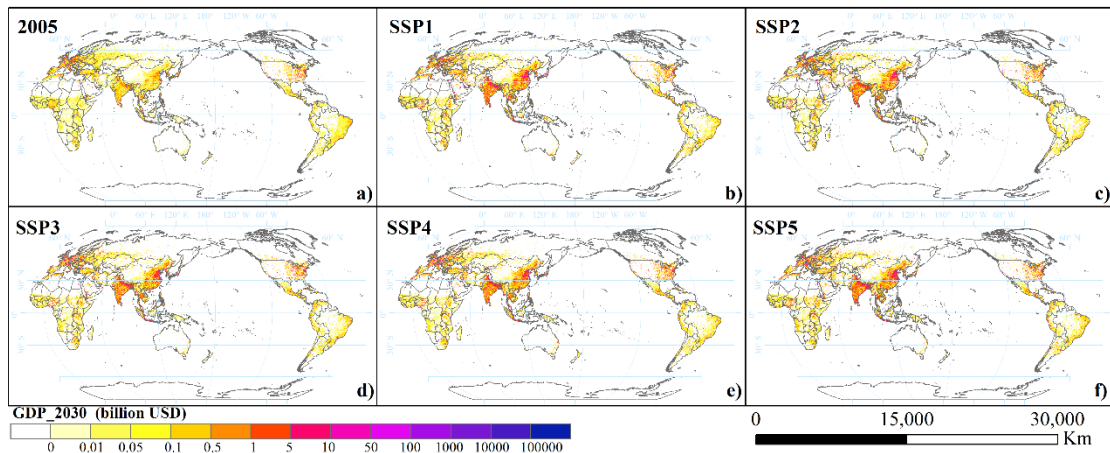

Figure S3 The spatial allocation of global GDP using GDP<sub>Pop</sub> approach for 2005 (a) and 2030 under SSP1-5 scenarios (b-f) with a spatial resolution of 1 km.

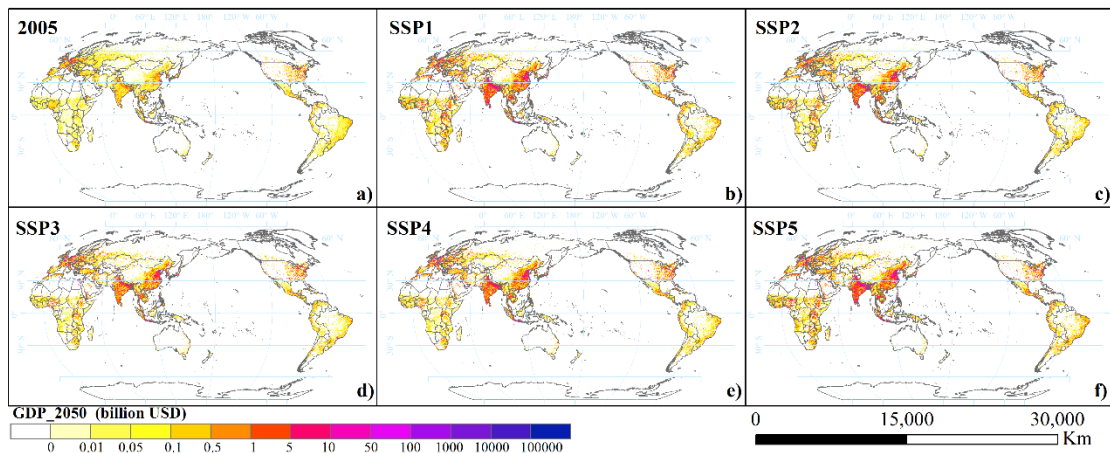

Figure S4 The spatial allocation of global GDP using GDP<sub>Pop</sub> approach for 2005 (a) and 2050 under SSP1-5 scenarios (b-f) with a spatial resolution of 1 km.

30  
31

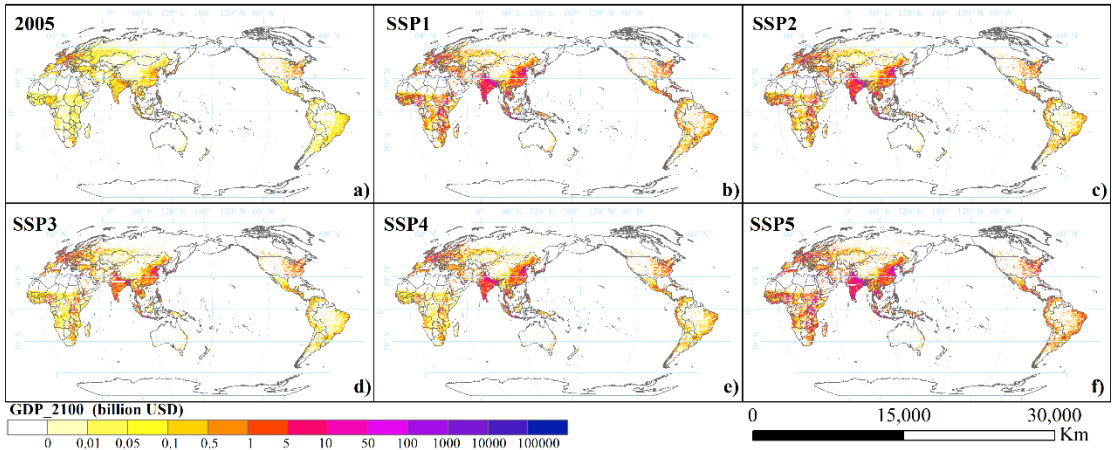

32

33 Figure S5 The spatial allocation of global GDP using GDP<sub>Pop</sub> approach for 2005 (a) and  
34 2100 under SSP1-5 scenarios (b-f) with a spatial resolution of 1 km.
